# Supplementary material for: Genetic and metabolic comparison of orthotopic and heterotopic patient-derived pancreatic-cancer xenografts to the original patient tumors
Source: PubMed Central journal article supplement (PMC5814265; doi:10.18632/oncotarget.23567), 2017-12-21
Supplement: oncotarget-09-7867-s001.pdf [file oncotarget-09-7867-s001.pdf]

## Genetic and metabolic comparison of orthotopic and heterotopic patient-derived pancreatic-cancer xenografts to the original patient tumors

### SUPPLEMENTARY MATERIALS

**Supplementary Table 1: Host and tumor characteristics of patient for PDX establishment**

| Case No. | PDOX/PDHX formation | Age/Sex | OP | Tumor size (cm) | Differentiation | pT/N/Mstage | p53 | C-erbB2 | DPC4 | Histology                        |
|----------|---------------------|---------|----|-----------------|-----------------|-------------|-----|---------|------|----------------------------------|
| 1        | O/O                 | 57 / F  | PD | 2.8             | Mod             | 3/1/0       | 3+  | 2+      | 1+   | pancreatic ductal adenocarcinoma |
| 2        | X/O                 | 59 / M  | PD | 2.9             | Mod             | 3/1/0       | 3+  | neg     | 2+   | pancreatic ductal adenocarcinoma |
| 3        | O/X                 | 73 / F  | PD | 3.7             | Mod             | 3/1/0       | neg | neg     | neg  | pancreatic ductal adenocarcinoma |
| 4        | O/O                 | 67 / F  | PD | 3.5             | Wel             | 3/1/0       | 1+  | neg     | neg  | pancreatic ductal adenocarcinoma |
| 5        | O/O                 | 60 / F  | PD | 2.8             | Mod             | 3/1/0       | 3+  | neg     | 2+   | pancreatic ductal adenocarcinoma |
| 6        | X/X                 | 53 / F  | DP | 3.7             | Mod             | 3/1/0       | 3+  | neg     | neg  | pancreatic ductal adenocarcinoma |
| 7        | O/O                 | 53 / F  | PD | 3.2             | Mod             | 3/1/0       | neg | neg     | neg  | pancreatic ductal adenocarcinoma |
| 8        | X/O                 | 68 / M  | PD | 2.2             | Mod             | 3/1/0       | 3+  | 1+      | 1+   | pancreatic ductal adenocarcinoma |
| 9        | O/O                 | 50 / M  | PD | 2.3             | Mod             | 3/0/0       | 3+  | neg     | neg  | pancreatic ductal adenocarcinoma |
| 10       | X/X                 | 62 / M  | PD | 2.2             | Mod             | 3/1/0       | 2+  | 1+      | neg  | pancreatic ductal adenocarcinoma |
| 11       | O/X                 | 50 / M  | PD | 3               | Mod             | 3/1/0       | 2+  | neg     | neg  | pancreatic ductal adenocarcinoma |
| 12       | O/O                 | 60 / M  | PD | 4.1             | Por             | 3/1/0       | neg | neg     | neg  | pancreatic ductal adenocarcinoma |
| 13       | X/X                 | 74 / M  | PD | 4               | Mod             | 3/1/0       | neg | 2+      | 2+   | pancreatic ductal adenocarcinoma |
| 14       | O/O                 | 73 / F  | DP | 5.4             | Mod             | 3/1/0       | 3+  | 1+      | 1+   | pancreatic ductal adenocarcinoma |
| 15       | O/O                 | 70 / F  | PD | 1.7             | Mod             | 3/1/0       | 3+  | neg     | neg  | pancreatic ductal adenocarcinoma |
| 16       | O/O                 | 58 / F  | PD | 3.5             | Mod             | 3/1/0       | 3+  | neg     | 1+   | pancreatic ductal adenocarcinoma |
| 17       | O/O                 | 60 / M  | DP | 4.9             | Mod             | 3/0/1       | 3+  | neg     | 1+   | pancreatic ductal adenocarcinoma |
| 18       | X/O                 | 73 / F  | PD | 3.6             | Mod             | 3/1/0       | 3+  | neg     | 3+   | pancreatic ductal adenocarcinoma |
| 19       | X/O                 | 68 / F  | PD | 3.1             | Mod             | 3/0/0       | 2+  | neg     | neg  | pancreatic ductal adenocarcinoma |
| 20       | O/O                 | 54 / F  | DP | 2.9             | Mod             | 3/1/0       | 1+  | 1+      | neg  | pancreatic ductal adenocarcinoma |
| 21       | X/X                 | 66 / M  | PD | 3.1             | Mod             | 3/1/0       | neg | 1+      | 2+   | pancreatic ductal adenocarcinoma |
| 22       | O/O                 | 61 / F  | PD | 4.5             | Mod             | 3/0/0       | neg | neg     | neg  | pancreatic ductal adenocarcinoma |
| 23       | O/X                 | 50 / M  | PD | 3               | Mod             | 3/1/0       | 3+  | neg     | neg  | pancreatic ductal adenocarcinoma |
| 24       | O/O                 | 53 / M  | DP | 5               | Por             | 3/0/1       | neg | neg     | neg  | pancreatic ductal adenocarcinoma |
| 25       | O/O                 | 75 / F  | DP | 2.8             | Mod             | 3/1/0       | 3+  | neg     | 3+   | pancreatic ductal adenocarcinoma |

(OP, operation; PD, pancreaticoduodenectomy; DP, distal pancreatectomy; Wel, well differentiated; Mod, moderate differentiated; Por, poor differentiated; DPC4, deleted in pancreatic carcinoma locus 4. \* All of the metastases were liver metastasis.

**Supplementary Table 2: SNPs of BRCA2/NBEA among human and PDXs in Group No.7. See\_ Supplementary\_Table 2**

**Supplementary Table 3: SNPs of HIVEP1/SDK2/SMAD3/SPTB among human and PDXs in Group No.16. See\_ Supplementary\_Table 3**

**Supplementary Table 4: Comparative analysis of the DNA methylation of patient derived xenograft in cancer related genes**

| Gene      | No. of methylation site | PDOX / human    |                   |                  | PDHX / human    |                   |                  |
|-----------|-------------------------|-----------------|-------------------|------------------|-----------------|-------------------|------------------|
|           |                         | Unchanged       | changed           |                  | Unchanged       | changed           |                  |
|           |                         |                 | Hyper-methylation | Hypo-methylation |                 | Hyper-methylatoin | Hypo-methylation |
| ACVR2A    | 19                      | 19              | 0                 | 0                | 19              | 0                 | 0                |
| APC       | 40                      | 36              | 0                 | 4                | 34              | 0                 | 6                |
| ARID1A    | 29                      | 27              | 2                 | 0                | 27              | 2                 | 0                |
| ATM       | 59                      | 55              | 4                 | 0                | 59              | 0                 | 0                |
| BCORL1    | 20                      | 19              | 0                 | 1                | 20              | 0                 | 0                |
| BRCA1     | 52                      | 52              | 0                 | 0                | 49              | 0                 | 3                |
| BRCA2     | 19                      | 19              | 0                 | 0                | 19              | 0                 | 0                |
| CALD1     | 57                      | 52              | 0                 | 5                | 50              | 0                 | 7                |
| CDKN2A    | 7                       | 1               | 6                 | 0                | 4               | 3                 | 0                |
| DISP2     | 18                      | 17              | 0                 | 1                | 16              | 0                 | 2                |
| FBLN2     | 50                      | 43              | 0                 | 7                | 46              | 0                 | 4                |
| FBXW7     | 22                      | 22              | 0                 | 0                | 22              | 0                 | 0                |
| HIVEP1    | 27                      | 27              | 0                 | 0                | 27              | 0                 | 0                |
| ITPR3     | 50                      | 48              | 0                 | 2                | 46              | 0                 | 4                |
| JAG1      | 24                      | 23              | 1                 | 0                | 24              | 0                 | 0                |
| KALRN     | 67                      | 62              | 0                 | 5                | 60              | 0                 | 7                |
| KDM6A     | 15                      | 15              | 0                 | 0                | 15              | 0                 | 0                |
| KRAS      | 34                      | 33              | 0                 | 1                | 33              | 0                 | 1                |
| MACF1     | 87                      | 78              | 2                 | 7                | 77              | 1                 | 9                |
| MAP2K4    | 25                      | 25              | 0                 | 0                | 25              | 0                 | 0                |
| MLL3      | 24                      | 23              | 1                 | 0                | 22              | 2                 | 0                |
| MYCBP2    | 19                      | 19              | 0                 | 0                | 19              | 0                 | 0                |
| NBEA      | 58                      | 57              | 1                 | 0                | 57              | 0                 | 1                |
| NF2       | 19                      | 19              | 0                 | 0                | 19              | 0                 | 0                |
| PBRM1     | 18                      | 15              | 3                 | 0                | 17              | 1                 | 0                |
| PLXNB2    | 45                      | 45              | 0                 | 0                | 34              | 0                 | 11               |
| PTEN      | 63                      | 62              | 1                 | 0                | 62              | 0                 | 1                |
| RBM10     | 29                      | 29              | 0                 | 0                | 29              | 0                 | 0                |
| RNF43     | 11                      | 8               | 1                 | 2                | 7               | 1                 | 3                |
| SDK2      | 68                      | 65              | 0                 | 3                | 63              | 1                 | 4                |
| SETD2     | 24                      | 24              | 0                 | 0                | 24              | 0                 | 0                |
| SF3B1     | 17                      | 17              | 0                 | 0                | 17              | 0                 | 0                |
| SIN3B     | 18                      | 18              | 0                 | 0                | 17              | 0                 | 1                |
| SMAD3     | 58                      | 53              | 0                 | 5                | 53              | 0                 | 5                |
| SMAD4     | 15                      | 12              | 3                 | 0                | 14              | 1                 | 0                |
| SMARCA4   | 44                      | 43              | 0                 | 1                | 42              | 0                 | 2                |
| SPTB      | 33                      | 31              | 0                 | 2                | 31              | 0                 | 2                |
| TGFBR1    | 10                      | 8               | 0                 | 2                | 7               | 1                 | 2                |
| TGFBR2    | 37                      | 33              | 1                 | 3                | 33              | 1                 | 3                |
| TLE4      | 16                      | 16              | 0                 | 0                | 15              | 1                 | 0                |
| TP53      | 38                      | 32              | 6                 | 0                | 37              | 0                 | 1                |
| TP53BP2   | 20                      | 19              | 1                 | 0                | 20              | 0                 | 0                |
| U2AF1     | 20                      | 20              | 0                 | 0                | 20              | 0                 | 0                |
| Total (%) | 1425<br>(100%)          | 1341<br>(94.1%) | 33<br>(2.3%)      | 51<br>(3.6%)     | 1331<br>(93.4%) | 15<br>(1.1%)      | 79<br>(5.5%)     |

( X, unchanged ; O, changed ; +, hypermethylation ; -, hypomethylation )
